# Supplementary material for: Cyclin E/CDK2 and feedback from soluble histone protein regulate the S phase burst of histone biosynthesis
Source: PubMed Central journal article supplement — Cell Rep. Author manuscript; Available in PMC 2023 Aug 21. (PMC10440735; doi:10.1016/j.celrep.2023.112768), 2023-07-09
Supplement: NIHMS1920500-supplement-1.pdf [file NIHMS1920500-supplement-1.pdf]

**Cell Reports, Volume 42**

**Supplemental information**

**Cyclin E/CDK2 and feedback from soluble  
histone protein regulate the S phase  
burst of histone biosynthesis**

**Claire Armstrong, Victor J. Passanisi, Humza M. Ashraf, and Sabrina L. Spencer**

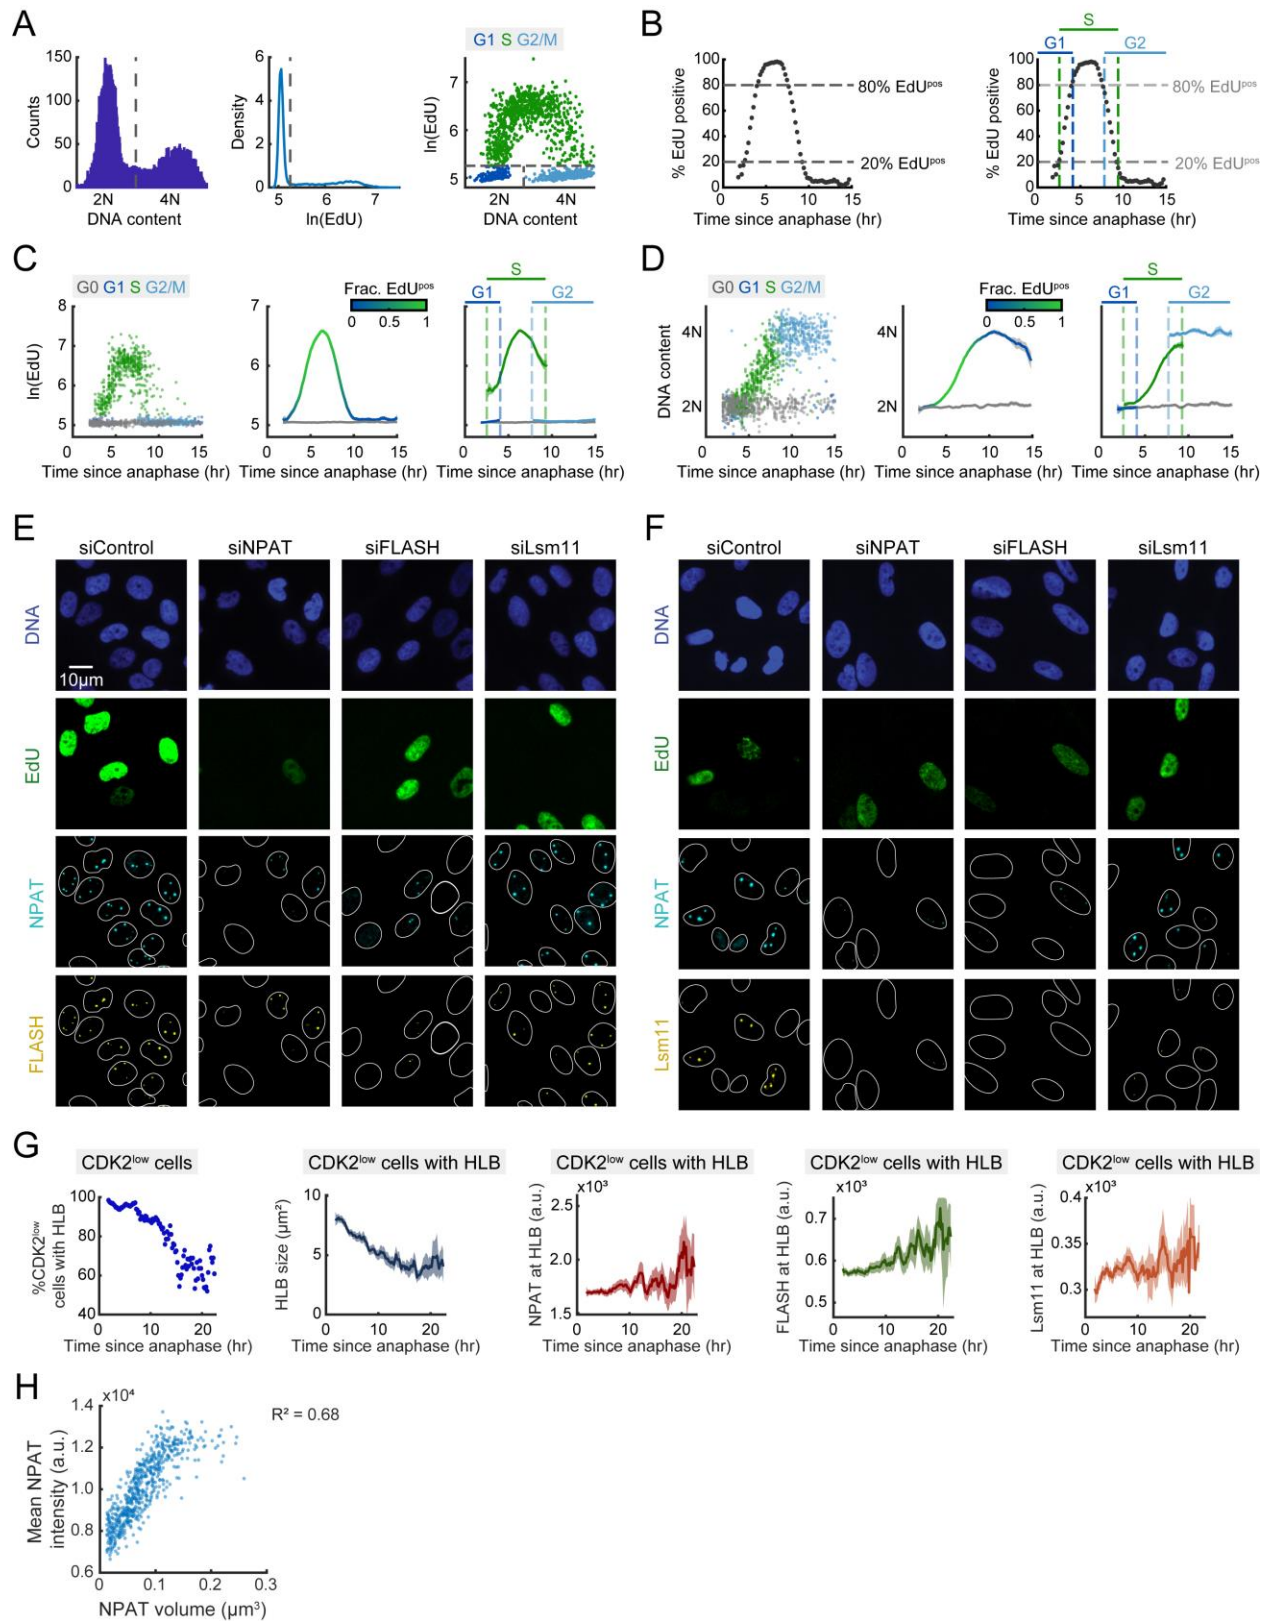

**Figure S1. Determination of cell-cycle phase, representative images of cells treated with siControl, siNPAT, siFLASH, and siLsm11, and HLB quantification in CDK2<sup>low</sup> cells, related to Figure 1-2. (A)**

Column 1: Histogram of DNA content based on Hoestch signal of all cells in the population, with cutoff for 2N vs 4N DNA content being determined by local minima. Column 2: ksdensity plot of EdU signal for all cells in the population, with cutoffs for EdU<sup>neg</sup> vs. EdU<sup>pos</sup> being determined by local minima. Column 3: Representative scatter of EdU vs. DNA content in CDK2<sup>inc</sup> cells following timelapse imaging segmented by cell-cycle phase. (B) Column 1: Percent EdU<sup>pos</sup> cells at each timepoint for CDK2<sup>inc</sup> population aligned to anaphase. Column 2: Cutoff of timing for each cell-cycle phase, where G1 cells are plotted from anaphase to the timepoint when 80% of cells are EdU<sup>pos</sup>; S cells from the timepoint when 20% of cells are EdU<sup>pos</sup> until the timepoint when 80% of cells are EdU<sup>neg</sup>; and G2 cells between the timepoint when 20% of cells are EdU<sup>neg</sup> until the end of the cell cycle. (C-D) Column 1: Raw single-cell data. Column 2: Average EdU (C) or DNA content (D) signal and 95% confidence intervals as a function of time since anaphase for CDK2<sup>inc</sup> and CDK2<sup>low</sup> populations. Column 3: CDK2<sup>inc</sup> population from column 2 segmented into G1 cells defined as 2N DNA content and EdU<sup>neg</sup>, S cells defined as EdU<sup>pos</sup>, and G2/M populations defined as 4N DNA content and EdU<sup>neg</sup>. (E-F) Representative images of cells treated with 25nM of siControl, siNPAT, siFLASH, and siLsm11 for 48 hr prior to fixation with live-cell imaging in the final 18 hr, stained for DNA, EdU, NPAT, and either FLASH (E) or Lsm11 (F) (see Figure 1E). (G) Column 1: Percent of CDK2<sup>low</sup> cells with HLB puncta as a function of time spent out of the cell cycle. Column 2-5: Average HLB size (2) and average HLB signal for NPAT (3), FLASH (4), or Lsm11 (5) with 95% confidence interval in CDK2<sup>low</sup> cells with HLBs. (H) Scatter of mean NPAT intensity vs NPAT volume.

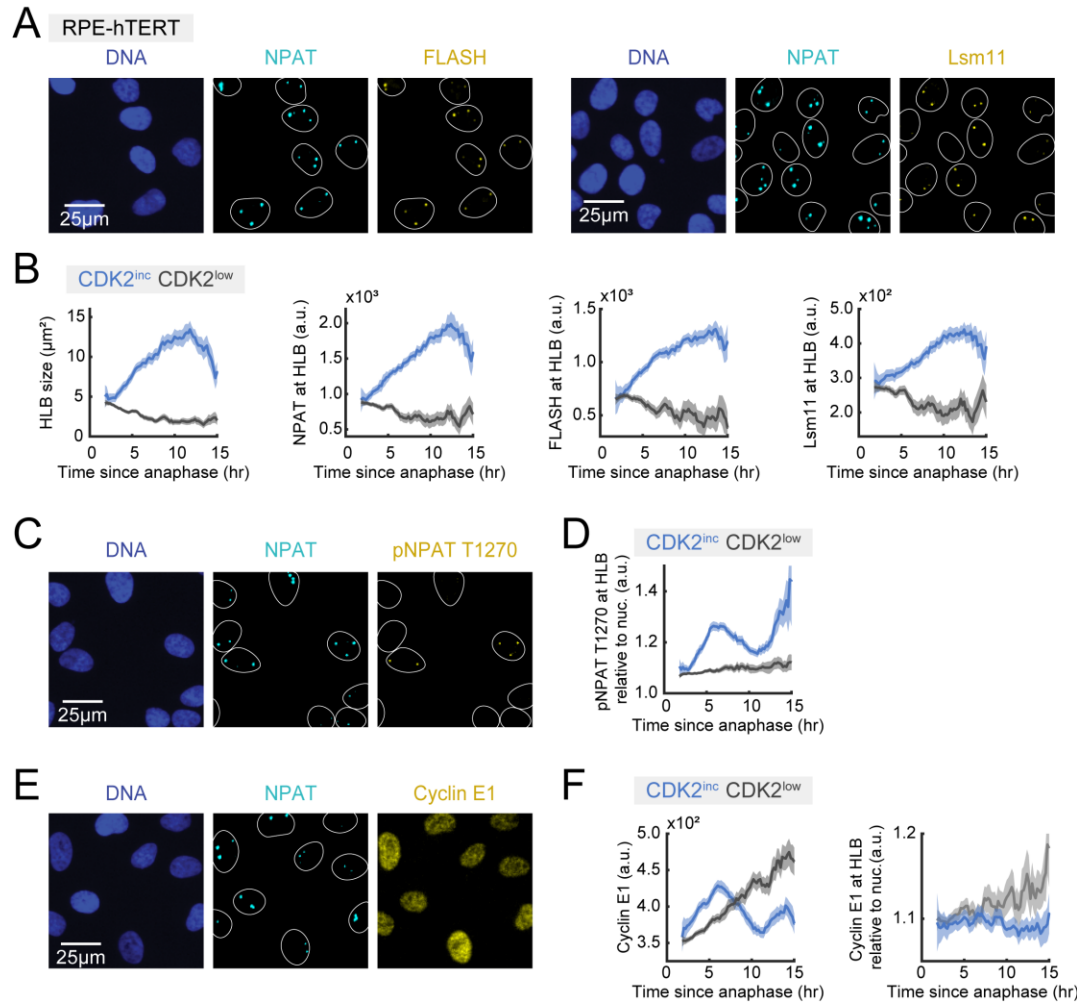

**Figure S2. HLB formation and NPAT phosphorylation in RPE-hTERT cells related to Figure 1-3.** (A) Representative images of cells following timelapse imaging, stained for DNA content, NPAT and either FLASH or Lsm11. (B) Average of the total HLB size per cell, or protein signal at the HLB, and 95% confidence intervals as a function of time since anaphase for CDK2<sup>inc</sup> and CDK2<sup>low</sup> populations. (C) Representative images of cells following timelapse imaging, stained for DNA content, NPAT and pNPAT T1270. (D) Average HLB signal for pNPAT T1270 normalized to nuclear signal for CDK2<sup>inc</sup> and CDK2<sup>low</sup> populations. (E) Representative images of cells following timelapse imaging, stained for DNA content, NPAT and Cyclin E1. (F) Average nuclear signal for Cyclin E1 (left) and average HLB signal for Cyclin E1 normalized to nuclear signal (right) and 95% confidence intervals as a function of time since anaphase for CDK2<sup>inc</sup> and CDK2<sup>low</sup> populations.

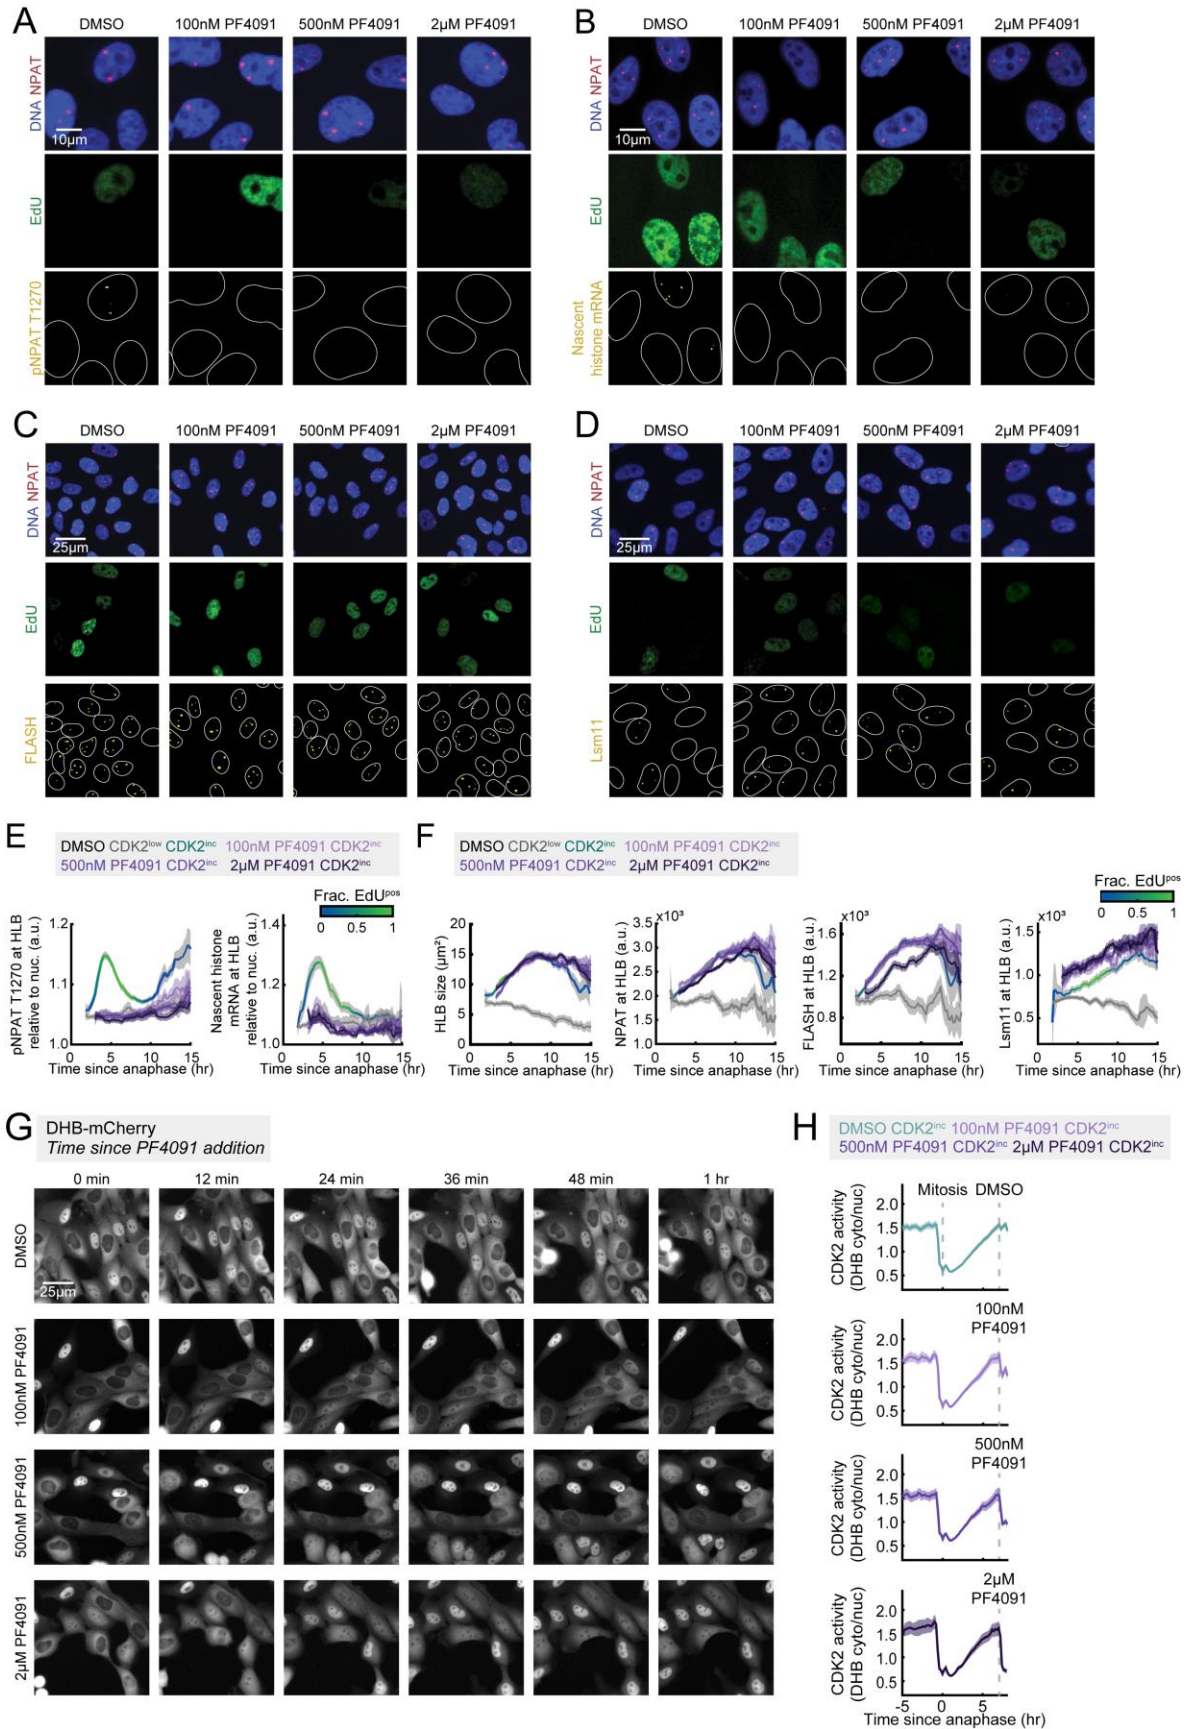

**Figure S3. Representative images and additional data on PF4091 treatment, related to Figure 3.** (A-D) Representative images of cells treated with 100nM, 500nM, and 2 $\mu$ M of PF-07104091 (PF4091) for the last 1 hr of live-cell imaging, before staining for DNA, EdU, NPAT, and either pNPAT T1270 (A), nascent histone mRNA (B), FLASH (C) or Lsm11 (D). (E) Average HLB signal for pNPAT T1270 and nascent histone mRNA FISH normalized to nuclear signal for CDK2<sup>inc</sup> and CDK2<sup>low</sup> populations for cells treated with DMSO, and CDK2<sup>inc</sup> population for cells treated with 100nM, 500nM, or 2 $\mu$ M PF-07104091 (PF4091) for the last 1 hr of live-cell imaging. (F) Average HLB size and average HLB signal with 95% confidence interval for NPAT, FLASH, and Lsm11 for CDK2<sup>inc</sup> and CDK2<sup>low</sup> populations for cells treated with DMSO, and CDK2<sup>inc</sup> population for cells treated with 100nM, 500nM, or 2 $\mu$ M PF-07104091 (PF4091) in the for the last 1 hr of live-cell imaging. (G) Representative images of the final 1 hr of live-cell imaging of the CDK2 activity sensor in cells treated with 100nM, 500nM, or 2 $\mu$ M PF-07104091 (PF4091). (H) Average CDK2 activity and 95% confidence interval of CDK2<sup>inc</sup> cells aligned to anaphase that completed their last mitosis 10 hr before the final frame of the movie, with drug added in the final 1 hr of imaging (see Figure 3D, 3F).

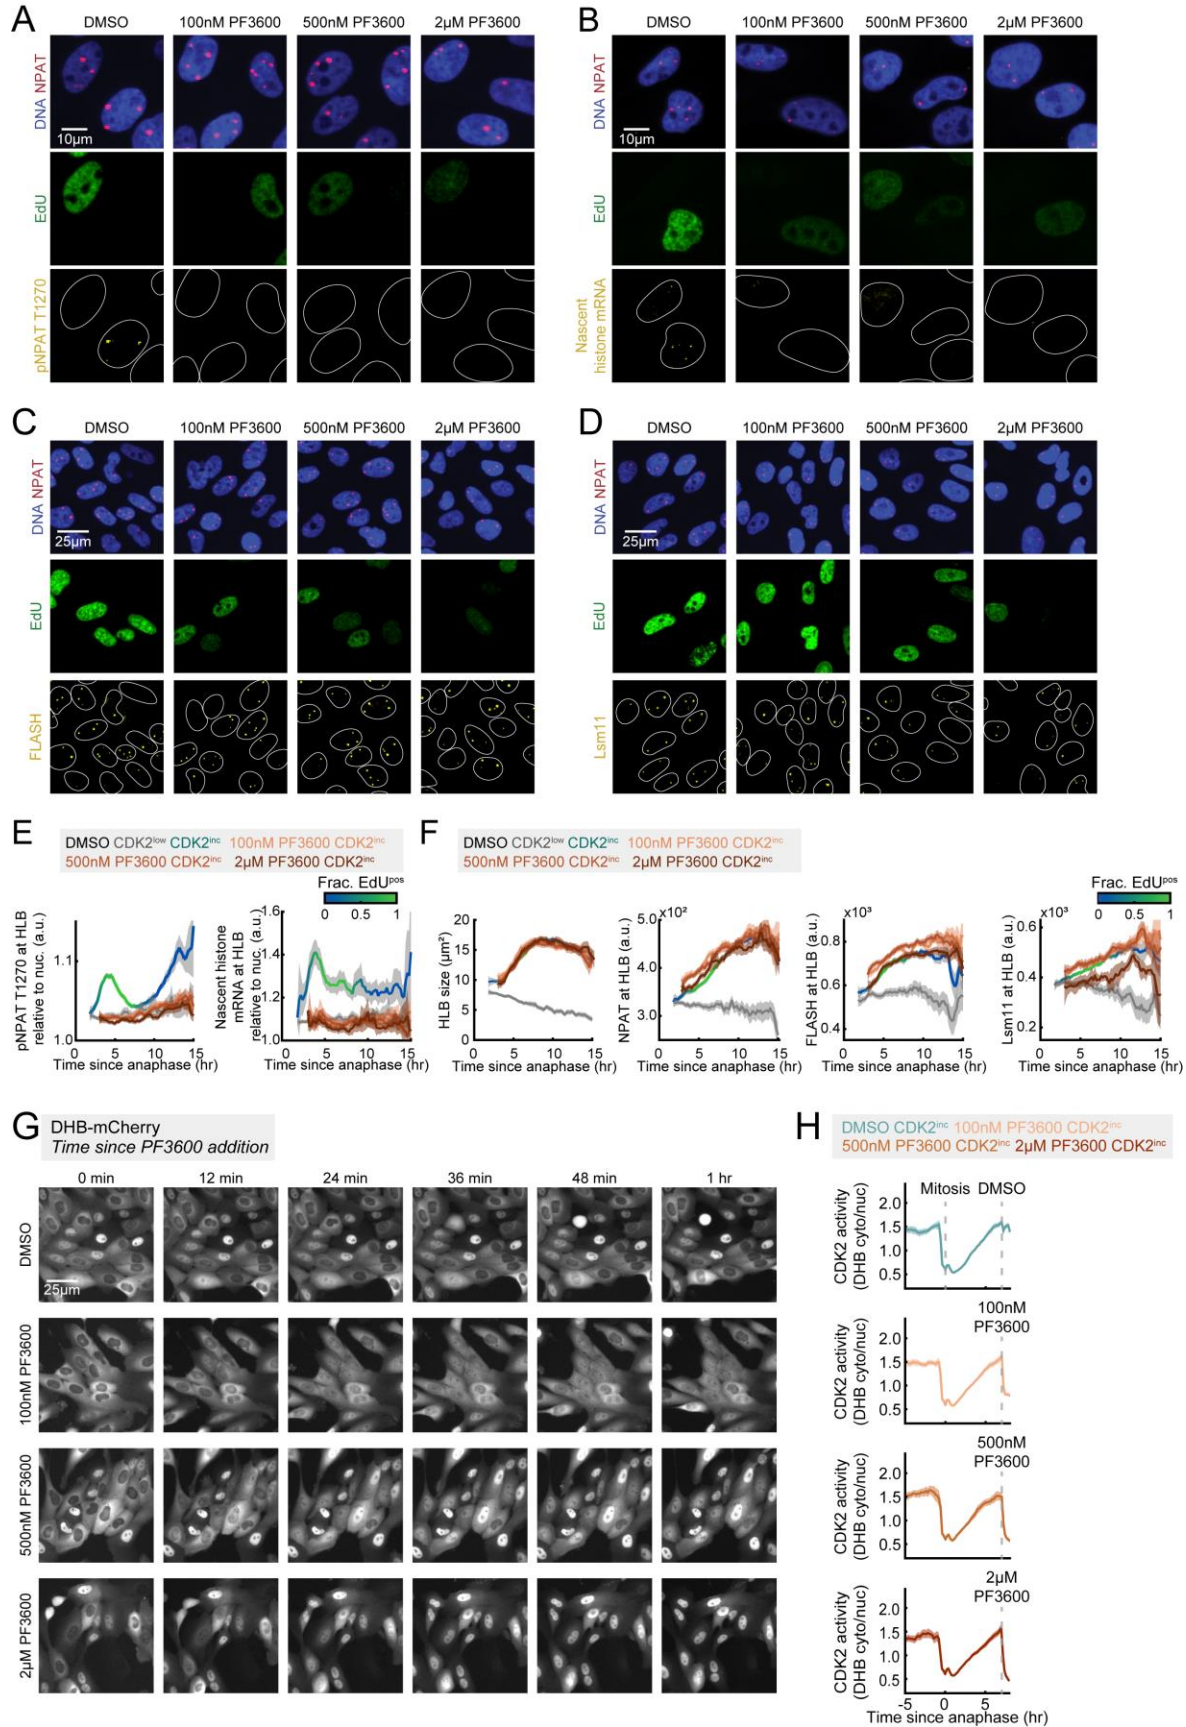

**Figure S4. DHB sensor translocation during PF3600 treatment, related to Figure 3.** (A-D) Representative images of cells treated with 100nM, 500nM, and 2 $\mu$ M of PF-06873600 (PF3600) for the last 1 hr of live-cell imaging, before staining for DNA, EdU, NPAT, and either pNPAT T1270 (A), nascent histone mRNA (B), FLASH (C) or Lsm11 (D). (E) Average HLB signal for pNPAT T1270 and nascent histone mRNA FISH normalized to nuclear signal for CDK2<sup>inc</sup> and CDK2<sup>low</sup> populations for cells treated with DMSO, and CDK2<sup>inc</sup> population for cells treated with 100nM, 500nM, or 2 $\mu$ M PF-06873600 (PF3600) for the last 1 hr of live-cell imaging. (F) Average HLB size and average HLB signal with 95% confidence interval for NPAT, FLASH, and Lsm11 for CDK2<sup>inc</sup> and CDK2<sup>low</sup> populations for cells treated with DMSO, and CDK2<sup>inc</sup> population for cells treated with 100nM, 500nM, or 2 $\mu$ M PF-06873600 (PF3600) in the for the last 1 hr of live-cell imaging. (G) Representative images of the final 1 hr of live-cell imaging of the CDK2 activity sensor in cells treated with 100nM, 500nM, or 2 $\mu$ M PF-06873600 (PF3600). (H) Average CDK2 activity and 95% confidence interval of CDK2<sup>inc</sup> cells aligned to anaphase that completed their last mitosis 10 hr before the final frame of the movie, with drug added in the final 1 hr of imaging (see Figure 3E, 3G).



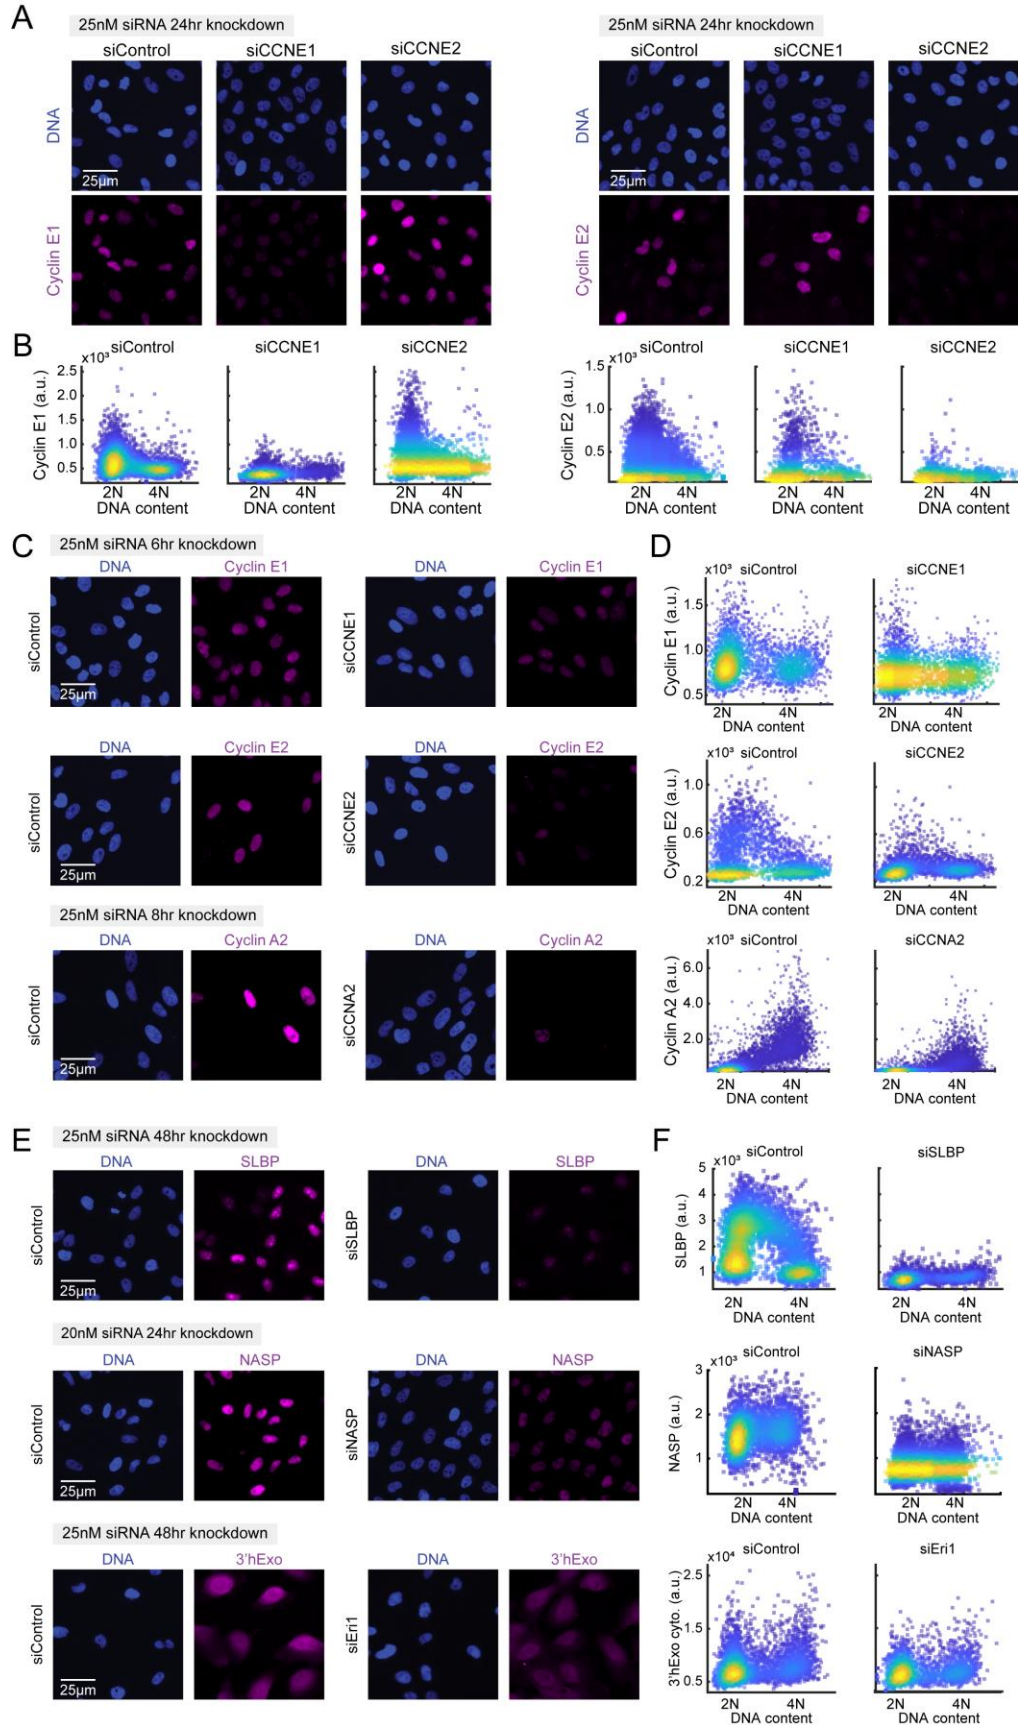

**Figure S5. Validation of antibodies and siRNA knockdowns, related to Figure 4-6.** (A-B) Representative images (A) and single cells plotted as either Cyclin E1 or Cyclin E2 (B) in cells treated with siControl, siCCNE1, or siCCNE2 (see Figure 4A-C). (C-D) Representative images (C) and single cells plotted as Cyclin E1, Cyclin E2, or Cyclin A2 vs. DNA content (D) for cells treated with siControl, siCCNE1, or siCCNE2 for 6 hr, or siControl or siCCNA2 for 8 hr (see Figure 4E). (E-F) Representative images (E) and single cells plotted as SLBP, NASP, or 3'hExo vs. DNA content (F) in cells treated with siControl and either siSLBP, siNASP, or siEri1 (see Figure 5A, 6B-G).

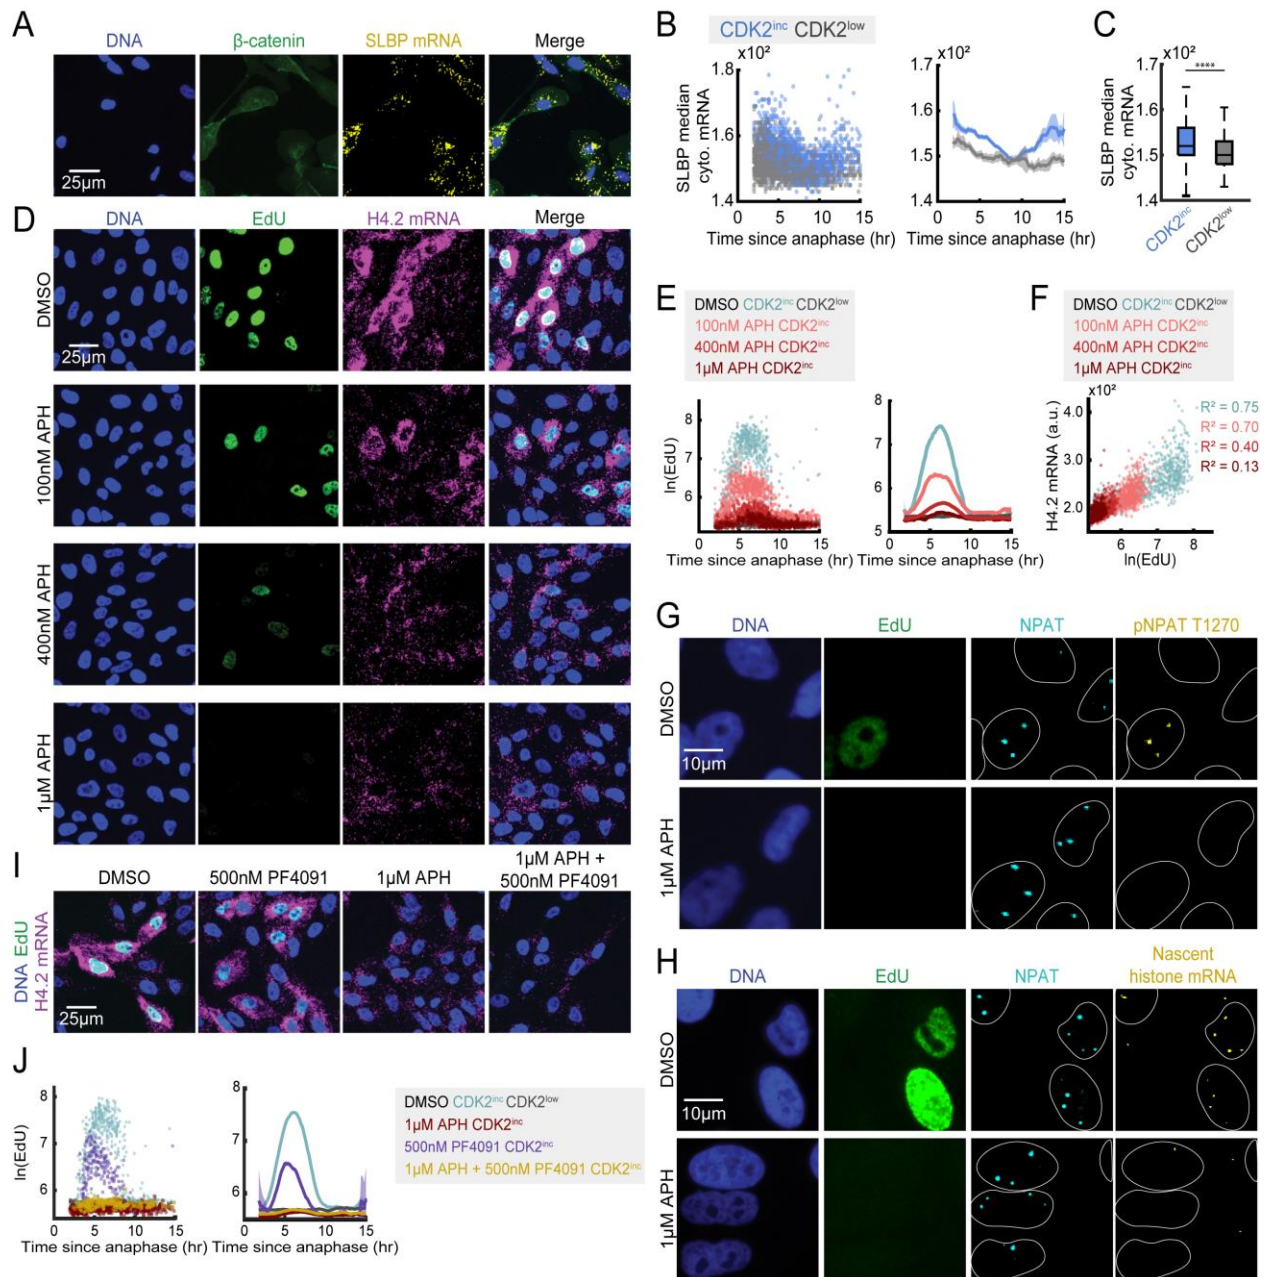

**Figure S6. SLBP expression and EdU incorporation upon DNA synthesis and CDK2 inhibition, related to Figure 5.** (A) Representative images of cells following live cell imaging, stained for DNA,  $\beta$ -catenin as a cytoplasmic marker, and SLBP mRNA. (B) Column 1: Raw single-cell data for CDK2<sup>inc</sup> and CDK2<sup>low</sup> populations. Column 2: Average cytoplasmic signal for SLBP mRNA and 95% confidence interval as a function of time since anaphase for data in column 1. (C) Median for CDK2<sup>inc</sup> vs CDK2<sup>low</sup> cells of SLBP mRNA. p-values are indicated as four stars p  $\leq$  0.0001. (D) Representative images of cells treated with DMSO, 100nM, 400nM, or 1 $\mu$ M APH during the last 1 hr of live-cell imaging, before staining for DNA, EdU, and histone H4.2 mRNA. (E) Column 1: Raw single-cell data. Column 2: Average EdU signal and 95% confidence intervals as a function of time since anaphase for CDK2<sup>inc</sup> and CDK2<sup>low</sup> cells treated with DMSO, as well as CDK2<sup>inc</sup> cells treated with 100nM, 400nM, or 1 $\mu$ M APH (see Figure 5E). (F) Representative scatter of histone H4.2 mRNA vs. EdU of CDK2<sup>inc</sup> cells for cells treated with DMSO, 100nM APH, 400nM APH, or 1 $\mu$ M APH, with the R-squared value reported from linear regression. (G-H) Representative images of cells treated with DMSO or 1 $\mu$ M APH in the last 1 hr of imaging, followed by staining for DNA, EdU,

NPAT and nascent histone RNA FISH (G) or pNPAT T1270 (H). (I) Representative images of cells treated with DMSO, 1 $\mu$ M APH, 500nM PF-07104091 (PF4091), or a combination of 1 $\mu$ M APH and 500nM PF-07104091 (PF4091). (J) Column 1: Raw single-cell data. Column 2: Average EdU signal and 95% confidence intervals as a function of time since anaphase for CDK2<sup>inc</sup> and CDK2<sup>low</sup> cells treated with DMSO, as well as CDK2<sup>inc</sup> cells treated with 1 $\mu$ M APH, 500nM PF-07104091 (PF4091), or a combination of 1 $\mu$ M APH and 500nM PF-07104091 (PF4091) (see Figure 5G).

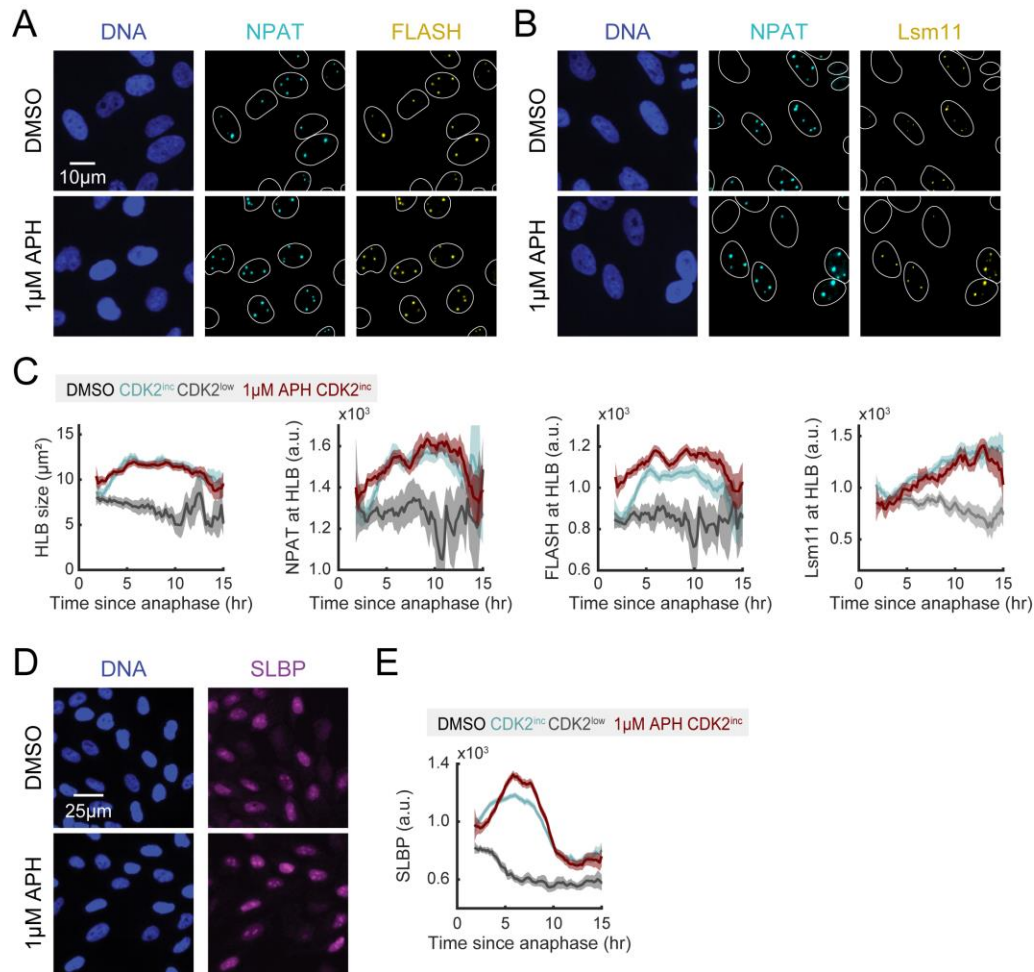

**Figure S7. HLB formation and SLBP levels upon DNA synthesis inhibition, related to Figure 5.** (A-B) Representative images of cells treated with DMSO or 1 $\mu$ M APH in the last 1 hr of imaging, followed by staining for DNA, NPAT, and FLASH (A) or Lsm11 (B). (C) Column 1-4: Average HLB size (1) and signal at the HLB for NPAT (2), FLASH (3), and Lsm11 (4) in CDK2<sup>inc</sup> and CDK2<sup>low</sup> cells treated with DMSO for 1 hr before fixation, with CDK2<sup>inc</sup> cells plotted for cells treated with 1 $\mu$ M APH for 1 hr before fixation. (D) Representative images of cells treated with DMSO or 1 $\mu$ M APH in the last 1 hr of imaging, followed by staining for SLBP. (E) Average nuclear signal for SLBP in CDK2<sup>inc</sup> and CDK2<sup>low</sup> cells treated with DMSO, and CDK2<sup>inc</sup> cells plotted for cells treated with 1 $\mu$ M APH for 1 hr before fixation.

| Gene   | Probe sequence<br>(reverse complement) | Position<br>relative to the<br>cleavage site | Gene   | Probe sequence<br>(reverse complement) | Position<br>relative to the<br>cleavage site |
|--------|----------------------------------------|----------------------------------------------|--------|----------------------------------------|----------------------------------------------|
| HIST1  |                                        |                                              | H3C11  | Agcttccttttggtgacaat                   | position 1                                   |
| H1-1   | Agctcttttctgaaatgcg                    | position 1                                   | H3C12  | Cagctatcctcagtgagaat                   | position 2                                   |
|        | Ggggatttcatctgtgtact                   | position 23                                  |        | Aagacagtcgaccaatgggtg                  | position 25                                  |
| H1-5   | Agccatttttagaggctctc                   | position 1                                   | H4C1   | Cagctctcttttgtttagt                    | position 1                                   |
|        | Cctgatctaacaatgtgtgc                   | position 23                                  | H4C3   | Caacgcatttcagctcttta                   | position 11                                  |
| H1-2   | Ccagctctttattgagatc                    | position 3                                   | H4C4   | Tactctttctcctgagtggga                  | position 1                                   |
| H1-3   | Cttcagctcttttgactgag                   | position 6                                   |        | Ctacacttttagcagtgact                   | position 23                                  |
| H1-4   | Acagctcttttactgagagc                   | position 3                                   | H4C5   | Aagtcagtgagcttttgcg                    | position 9                                   |
| H2AC1  | Acgttttgaacgtacagcc                    | position 15                                  | H4C6   | Cttcgtgtgacgaaggagggt                  | position 1                                   |
| H2AC4  | Tccaaagcacaacagctcat                   | position 13                                  | H4C7   | Gagcccttcggaagaaaacg                   | position 1                                   |
| H2AC6  | Tacaagcagtgagggttagct                  | position 16                                  | H4C11  | Accactctcagctgagaaa                    | position 2                                   |
| H2AC7  | Atgtgagccctttaaggaa                    | position 5                                   | H4C12  | Cggctctcagctgagaaaag                   | position 1                                   |
| H2AC8  | Gatttcagggcatcgtatgtg                  | position 25                                  | H4C13  | Tagtctacagctctttcaca                   | position 8                                   |
| H2AC12 | Tttcttaagacagtgtaga                    | position 2                                   | HIST2  |                                        |                                              |
|        | Aacaaacatgactgtgtcca                   | position 24                                  | H2AC21 | Cagcccttcattgacactt                    | position 1                                   |
| H2AC13 | Tgctcagttctccacaaaa                    | position 4                                   |        | Agctaatgcgctatttcgtg                   | position 23                                  |
| H2AC14 | Ggactcgtgtcatctttta                    | position 8                                   |        | Aaaggctcttttagagcca                    | position 62                                  |
| H2AC15 | Acacagctctacttggtgaa                   | position 5                                   | H2AC20 | Acgaaatagcgcattagctc                   | position 15                                  |
| H2AC16 | Cagctctccccgagaaaatag                  | position 1                                   |        | Agtgtcaaataagagggtgga                  | position 37                                  |
|        | Gttccaaatgttaaccagt                    | position 25                                  |        | Aaggctctttaagagccac                    | position 60                                  |
| H2AC17 | Cagttctccgtagaaatgg                    | position 1                                   | H2BC18 | Acagctgtttctcgattac                    | position 1                                   |
|        | Taggtttggagaacagagtg                   | position 23                                  |        | Tcaaacgctctgacaagtg                    | position 23                                  |
| H2BC1  | Cacagctgtttcagtatgtt                   | position 1                                   |        | Actccctacctgacaaaaag                   | position 46                                  |
| H2BC3  | Tatagctctcctgtgacaaa                   | position 3                                   |        | Cgaatgcatccgtgaccatg                   | position 71                                  |
| H2BC6  | Catgtcagtatatagctcca                   | position 13                                  | H2BC21 | Gctcttttctagtattagg                    | position 1                                   |
| H2BC7  | Atgcaggttaattacaactct                  | position 14                                  |        | Ccatgaccttcactaaaa                     | position 63                                  |
| H2BC10 | Ccaatgccaagtctggaaaa                   | position 24                                  |        | Aaaaagctacgtatgccatt                   | position 85                                  |
| H2BC12 | Gtttacagctctaataatcga                  | position 6                                   | H3C15  | Ggtacagctcttccaagtg                    | position 7                                   |
| H2BC13 | Cccagtgataggaagagcga                   | position 24                                  |        | Tctaagccggaggagcacg                    | position 37                                  |
| H2BC14 | Agtgaactggctctttctg                    | position 8                                   |        | Cgtttgtgggagcctaag                     | position 75                                  |
| H2BC17 | Aaatgcacaggctctttctc                   | position 8                                   | H3C13  | Gtacagctgctttgatgaa                    | position 7                                   |
| H3C1   | Ggtttcttacagctacttta                   | position 4                                   |        | Gacgcacatcagatggagag                   | position 30                                  |
| H3C2   | Acagctactttcgttggaa                    | position 1                                   |        | Tttgggttctgtaacgtcac                   | position 91                                  |
| H3C3   | Accgaatgggttacaactgt                   | position 16                                  | H4C14  | Caactcctcagatgagcaag                   | position 1                                   |
| H3C6   | Caaaggattacagccctttt                   | position 12                                  |        | Tactgttgactttacgcag                    | position 30                                  |
| H3C7   | Acggcgctttcaactgaaat                   | position 5                                   |        | Ccaaagttacctccaacat                    | position 53                                  |
| H3C8   | Cacagctattttcgggtgaa                   | position 3                                   |        | Tttccgttaacttcagatcc                   | position 89                                  |
| H3C10  | Aaacagatctttcagcgcg                    | position 5                                   |        | Cgacttaagctttacggct                    | position 133                                 |

Supplementary Table S1. Nascent histone mRNA probe set. Related to Key Resources Table.
